# Supplementary material
Source: PubMed Central journal article supplement (PMC2536531)
Supplement: NIHMS60318-supplement-SI1.pdf [file NIHMS60318-supplement-SI1.pdf]

# Supporting Information

## Spectroscopic and Electronic Structure Study of the Enzyme-Substrate Complex of Intradiol Dioxygenases: Substrate Activation by a High Spin Ferric Non-Heme Iron Site

*Monita Y. M. Pau<sup>1</sup>, Mindy I. Davis<sup>1</sup>, Allen M. Orville<sup>2</sup>, John D. Lipscomb<sup>2\*</sup>, Edward I. Solomon<sup>1\*</sup>*

<sup>1</sup> Department of Chemistry, Stanford University, Stanford, CA 94305-5080, USA; <sup>2</sup> Department of Biochemistry, Molecular Biology and Biophysics and the Center for Metals in Biocatalysis, University of Minnesota, Minneapolis, MN 55455

Email: [edward.solomon@stanford.edu](mailto:edward.solomon@stanford.edu)

<sup>†</sup> Current address: Biology Department, Brookhaven National Laboratory, Upton, New York, 11973

**Table S1.** Cartesian coordinates of PCD-PCA model optimized with Gaussian BP86 and LanL2DZ as basis set

|    |           |           |           |
|----|-----------|-----------|-----------|
| Fe | 3.153799  | -0.396921 | -0.092229 |
| O  | 4.910209  | 0.264824  | -0.416268 |
| C  | 5.538830  | 1.385579  | -0.905698 |
| C  | 6.850401  | 1.282774  | -1.457662 |
| C  | 7.487417  | 2.422915  | -2.000026 |
| C  | 6.850649  | 3.693235  | -2.006299 |
| C  | 5.555158  | 3.787680  | -1.425625 |
| C  | 4.902708  | 2.665340  | -0.882744 |
| C  | 7.496111  | 4.912735  | -2.645815 |
| H  | 7.344358  | 0.303476  | -1.468238 |
| H  | 8.491048  | 2.321801  | -2.435231 |
| H  | 8.571124  | 4.748354  | -2.843876 |
| H  | 7.015247  | 5.159263  | -3.613802 |
| H  | 7.403194  | 5.807760  | -2.001317 |
| H  | 5.042459  | 4.759604  | -1.415865 |
| H  | 3.888622  | 2.729154  | -0.474971 |
| N  | 3.688235  | -2.317116 | -0.928221 |
| C  | 2.896297  | -3.234967 | -1.525813 |
| N  | 3.664878  | -4.307519 | -1.953185 |
| C  | 5.019521  | -4.070667 | -1.612723 |
| C  | 5.006886  | -2.822511 | -0.981664 |
| C  | 6.138150  | -5.045851 | -1.918085 |
| H  | 1.822556  | -3.131601 | -1.662323 |
| H  | 3.313853  | -5.118289 | -2.464058 |
| H  | 5.832410  | -2.232254 | -0.592929 |
| H  | 6.241548  | -5.224152 | -3.005216 |
| H  | 5.979804  | -6.023442 | -1.423796 |
| H  | 7.093387  | -4.633471 | -1.554668 |
| N  | 3.443059  | -0.978068 | 1.913149  |
| C  | 3.610648  | -0.174270 | 2.980075  |
| N  | 3.881061  | -0.939730 | 4.105041  |
| C  | 3.886219  | -2.301701 | 3.735117  |
| C  | 3.610844  | -2.299215 | 2.367454  |
| C  | 4.170666  | -3.429599 | 4.684489  |
| H  | 3.558962  | 0.910826  | 2.964727  |
| H  | 4.070669  | -0.575307 | 5.039202  |
| H  | 3.573222  | -3.139990 | 1.679590  |
| H  | 4.111260  | -4.390386 | 4.147200  |
| H  | 5.185903  | -3.356569 | 5.119322  |
| H  | 3.448561  | -3.466771 | 5.522943  |
| O  | 2.253424  | 1.392519  | -0.151229 |
| O  | 1.083311  | -0.949608 | -0.187433 |
| C  | 1.024704  | 1.379485  | -0.742430 |
| C  | 0.371241  | 0.089187  | -0.799606 |
| C  | -0.869613 | -0.055820 | -1.443270 |
| C  | -1.487873 | 1.081257  | -2.035055 |
| C  | -0.856369 | 2.359041  | -1.962273 |
| C  | 0.393161  | 2.514230  | -1.327804 |
| C  | -2.824574 | 0.916504  | -2.743324 |
| O  | -3.134272 | -0.313201 | -3.075074 |
| O  | -3.548352 | 1.972754  | -2.944609 |
| H  | -1.362004 | -1.028949 | -1.544758 |
| H  | -1.367660 | 3.207168  | -2.430902 |

|   |            |           |           |
|---|------------|-----------|-----------|
| H | 0.907047   | 3.481914  | -1.297516 |
| O | -4.853903  | -2.081642 | -3.498131 |
| C | -5.942608  | -2.111673 | -2.656224 |
| C | -6.456755  | -3.386942 | -2.408135 |
| C | -7.577110  | -3.529495 | -1.592559 |
| C | -8.160085  | -2.433463 | -0.984183 |
| C | -7.601487  | -1.169157 | -1.217557 |
| C | -6.512092  | -0.996452 | -2.055972 |
| C | -9.333103  | -2.640931 | -0.057484 |
| H | -4.248230  | -1.228269 | -3.403276 |
| H | -5.974803  | -4.241316 | -2.894317 |
| H | -7.994060  | -4.532317 | -1.419437 |
| H | -8.079526  | -0.288513 | -0.766091 |
| H | -6.106736  | -0.006916 | -2.282773 |
| H | -10.104626 | -3.293012 | -0.512191 |
| H | -9.027692  | -3.123069 | 0.894837  |
| H | -9.824110  | -1.684951 | 0.205516  |
| N | 0.209634   | -1.701048 | 2.101788  |
| N | -0.917180  | -2.859871 | 3.727433  |
| C | -0.751378  | -1.713943 | 3.013267  |
| N | -1.476095  | -0.664187 | 3.306149  |
| C | -1.505051  | 0.685734  | 2.857176  |
| H | 0.405338   | -1.172942 | 1.150376  |
| H | 0.915757   | -2.439978 | 2.188493  |
| H | -0.667471  | -3.753443 | 3.310628  |
| H | -1.409293  | -2.878949 | 4.619249  |
| H | -2.319270  | -0.896238 | 3.845155  |
| H | -0.539424  | 0.974542  | 2.408001  |
| H | -2.281864  | 0.852894  | 2.088922  |
| H | -1.708711  | 1.366122  | 3.701086  |
| C | -4.537363  | 2.961220  | -0.057782 |
| C | -5.397954  | 1.887051  | -0.245855 |
| C | -5.842138  | 1.136785  | 0.846162  |
| C | -5.467441  | 1.415802  | 2.150695  |
| C | -4.633989  | 2.518206  | 2.327645  |
| C | -4.145997  | 3.275017  | 1.243335  |
| C | -3.298509  | 4.294796  | 1.785908  |
| C | -3.278256  | 4.090285  | 3.158100  |
| N | -4.088201  | 3.019935  | 3.480782  |
| C | -2.555486  | 5.333990  | 1.003442  |
| H | -4.150706  | 3.499891  | -0.928493 |
| H | -5.683860  | 1.619092  | -1.263914 |
| H | -6.486178  | 0.271369  | 0.658314  |
| H | -5.838721  | 0.815992  | 2.991745  |
| H | -4.368318  | 2.758351  | 4.423461  |
| H | -2.764961  | 4.668430  | 3.926719  |
| H | -1.965196  | 5.999093  | 1.659972  |
| H | -1.859515  | 4.870871  | 0.277010  |
| H | -3.249546  | 5.969987  | 0.419628  |

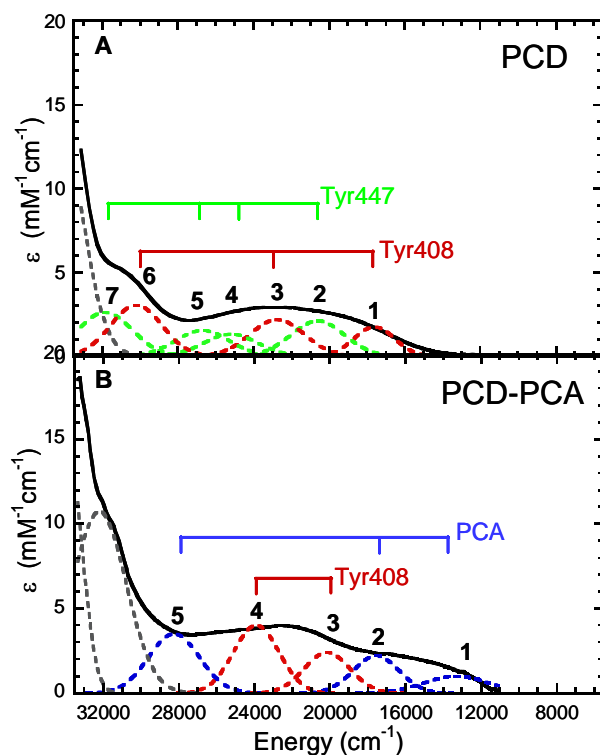

**Figure S1.** Gaussian resolution (---) of UV/VIS Abs spectra (—) at 4°C (A) PCD; red: Tyr408  $\rightarrow$  Fe<sup>3+</sup> CT, green: Tyr447  $\rightarrow$  Fe<sup>3+</sup> CT, (B) PCD-PCA; blue: PCA  $\rightarrow$  Fe<sup>3+</sup> CT, red: Tyr408  $\rightarrow$  Fe<sup>3+</sup> CT.

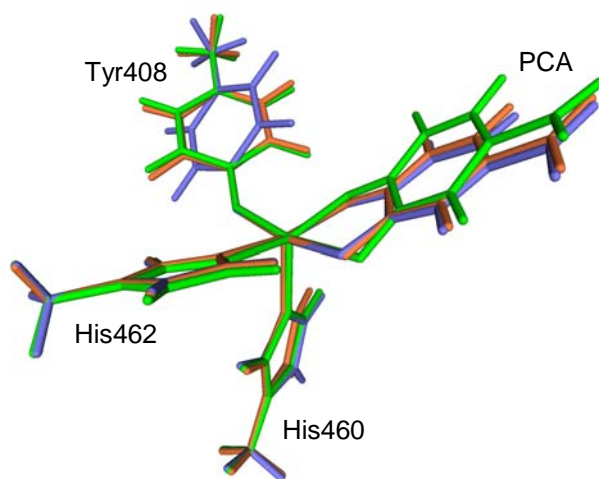

**Figure S2.** Overlay of PCD-PCA models optimized with BP86/LanL2DZ (green), BP86 + 10% HF exchange / TZVP (orange) and BP86 + 10% HF exchange / 6-31G\*/3-21G\* (purple). 2nd sphere residues not presented in diagram for clarity purpose.

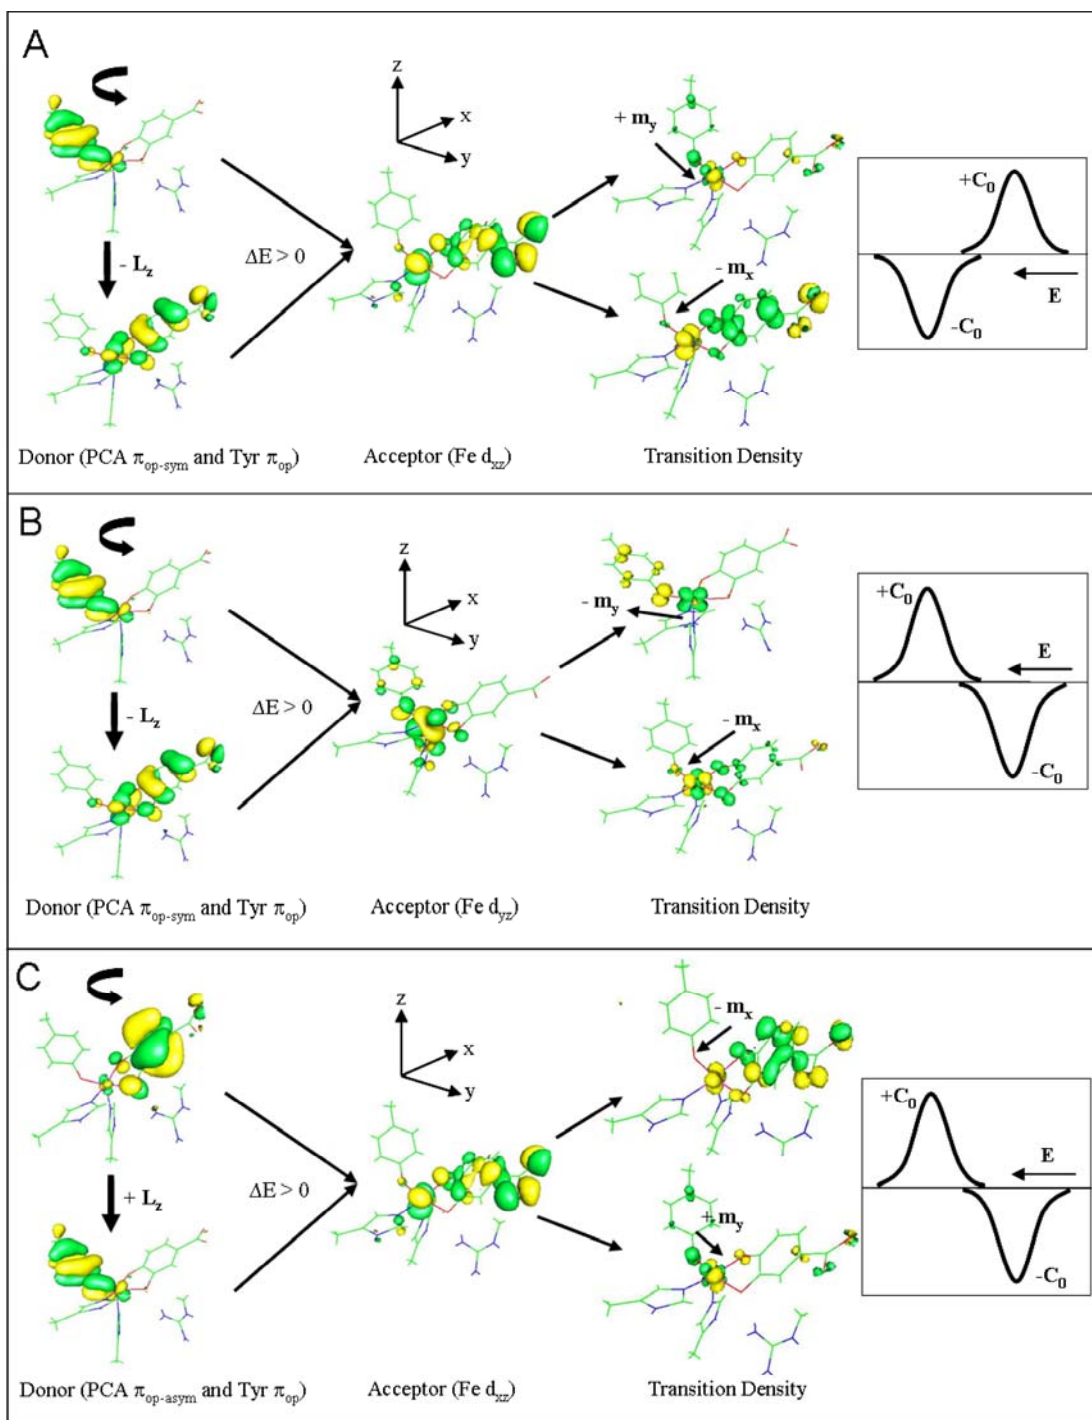

**Figure S3.** Graphical prediction of the signs of the  $C_0$ -parameters (= signs of C-terms) of the Tyr and PCA  $\rightarrow$  Fe<sup>3+</sup> CT transitions.

**Complete Reference for the Gaussian 03 program package in Ref 43:**

Frisch, M. J.; Trucks, G. W.; Schlegel, H. B.; Scuseria, G. E.; Robb, M. A.; Cheeseman, J. R.; Montgomery, J., J. A.; Vreven, T.; Kudin, K. N.; Burant, J. C.; Millam, J. M.; Iyengar, S. S.; Tomasi, J.; Barone, V.; Mennucci, B.; Cossi, M.; Scalmani, G.; Rega, N.; Petersson, G. A.; Nakatsuji, H.; Hada, M.; Ehara, M.; Toyota, K.; Fukuda, R.; Hasegawa, J.; Ishida, M.; Nakajima, T.; Honda, Y.; Kitao, O.; Nakai, H.; Klene, M.; Li, X.; Knox, J. E.; Hratchian, H. P.; Cross, J. B.; Bakken, V.; Adamo, C.; Jaramillo, J.; Gomperts, R.; Stratmann, R. E.; Yazyev, O.; Austin, A. J.; Cammi, R.; Pomelli, C.; Ochterski, J. W.; Ayala, P. Y.; Morokuma, K.; Voth, G. A.; Salvador, P.; Dannenberg, J. J.; Zakrzewski, V. G.; Dapprich, S.; Daniels, A. D.; Strain, M. C.; Farkas, O.; Malick, D. K.; Rabuck, A. D.; Raghavachari, K.; Foresman, J. B.; Ortiz, J. V.; Cui, Q.; Baboul, A. G.; Clifford, S.; Cioslowski, J.; Stefanov, B. B.; Liu, G.; Liashenko, A.; Piskorz, P.; Komaromi, I.; Martin, R. L.; Fox, D. J.; Keith, T.; Al-Laham, M. A.; Peng, C. Y.; Nanayakkara, A.; Challacombe, M.; Gill, P. M. W.; Johnson, B.; Chen, W.; Wong, M. W.; Gonzalez, C.; Pople, J. A., *Gaussian 03, Revision C.02*, <http://www.gaussian.com>, Wallingford CT, **2004**.
